# Supplementary material for: Two-step in situ synthesis of CsPbX3@TS-1 zeolite (X = Cl, Br, I) nanocomposites for optical thermometric, latent fingerprints and anti-counterfeiting applications
Source: Royal Society of Chemistry journal article supplement (doi:10.1039/d1qm01185e), 2021-01-01
Supplement: d1qm01185e1.pdf [file d1qm01185e1.pdf]

## Electronic Supplementary Information

### Two-step *in situ* synthesis of CsPbX<sub>3</sub>@TS-1 zeolites (X = Cl, Br, I) nanocomposites for optical thermometric, latent fingerprints and anti-counterfeiting applications

Le Han,<sup>a</sup> Yide Han,<sup>a</sup> Junbiao Wu,<sup>a</sup> Xia Zhang,<sup>a</sup> Zhuopeng Wang,<sup>a</sup> Yan Xu<sup>a,b\*</sup>

<sup>a</sup>Department of Chemistry, College of Sciences, Northeastern University, Shenyang, Liaoning 110819, PR China. E-mail: xuyanjl@126.com (Y. Xu); Fax: +86-024-83684533; Tel.: +86-024-83684533.

<sup>b</sup>Guangdong Provincial Key Laboratory of Functional Supramolecular Coordination Materials and Applications, Jinan University, Guangzhou 510632, China.

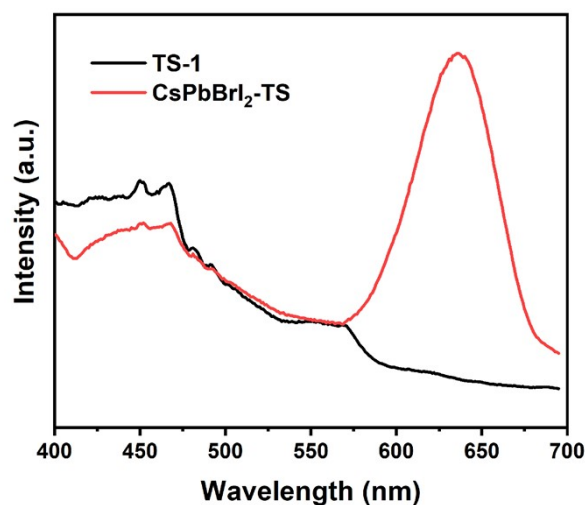

**Fig. S1** Photoluminescent emission spectra of TS-1 and CsPbBr<sub>2</sub>-TS composite.

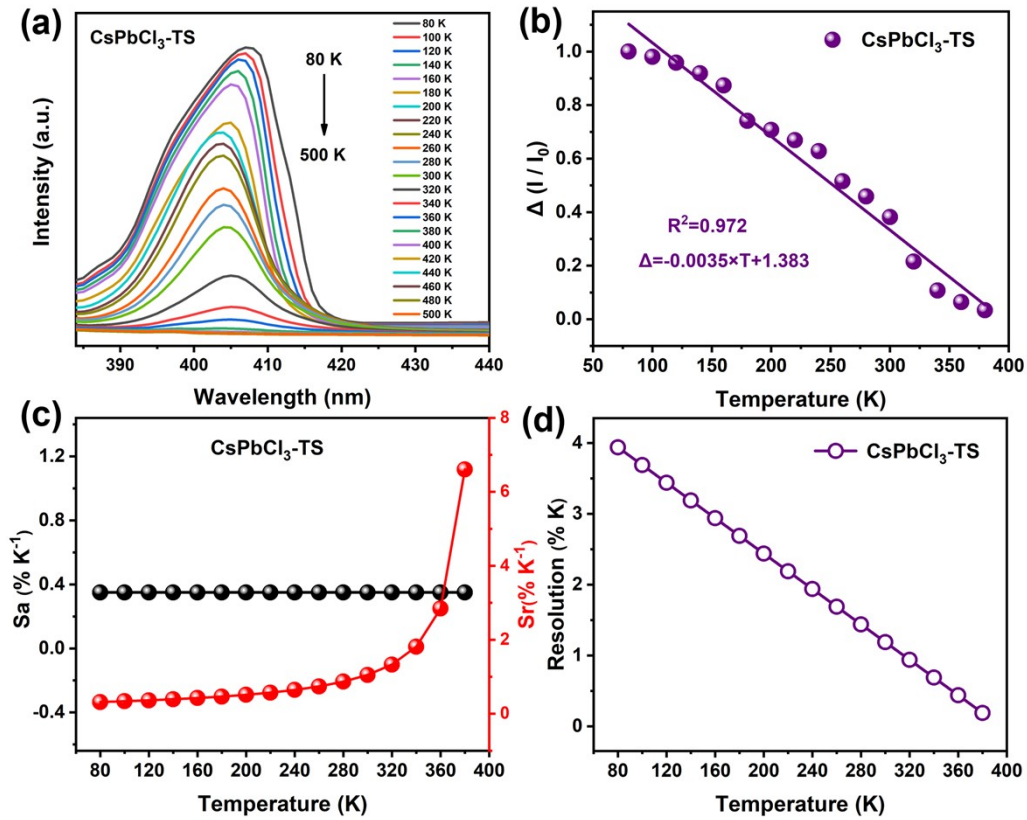

**Fig. S2** PL emission spectra of (a) CsPbCl<sub>3</sub>-TS at different temperatures range from 80 to 500 K; (b) PL intensity ratio of  $I/I_0$  as a function of temperature; (c) Absolute sensitivity ( $S_a$ ) and relative sensitivities ( $S_r$ ) at different temperatures; (d) Corresponding temperature resolution of CsPbCl<sub>3</sub>-TS versus temperatures.

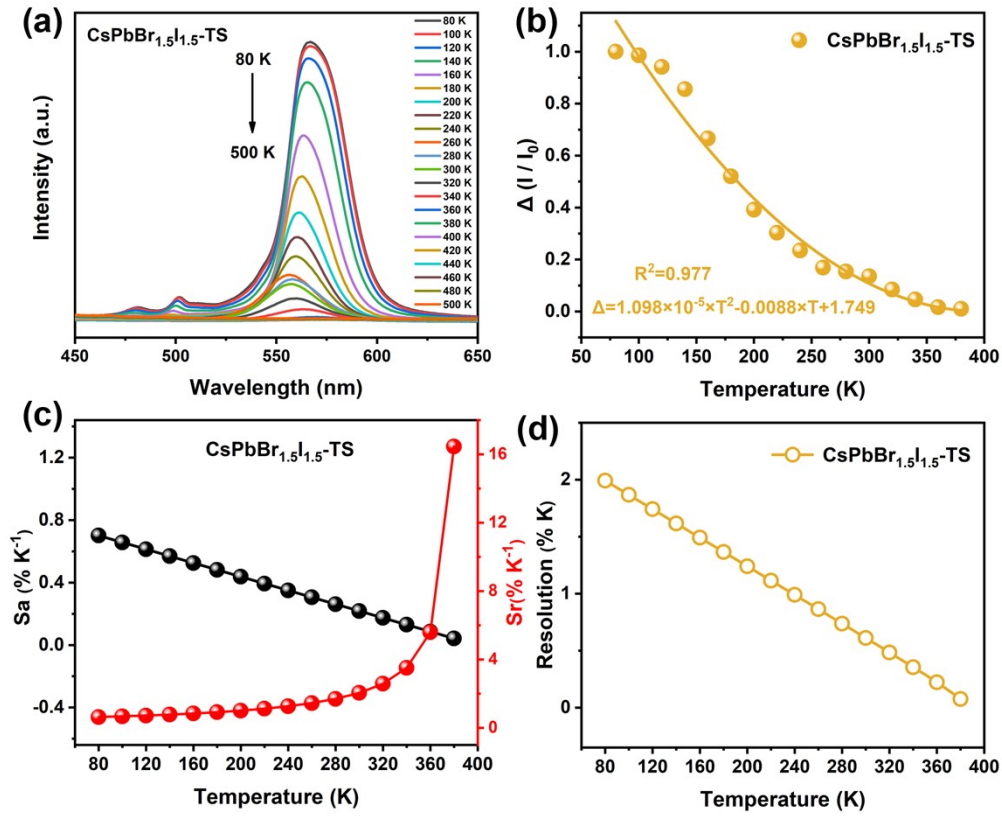

**Fig. S3** PL emission spectra of (a) CsPbBr<sub>1.5</sub>I<sub>1.5</sub>-TS at different temperatures range from 80 to 500 K; (b) PL intensity ratio of  $I/I_0$  as a function of temperature; (c) Absolute sensitivity ( $S_a$ ) and relative sensitivities ( $S_r$ ) at different temperatures; (d) Corresponding temperature resolution of CsPbBr<sub>1.5</sub>I<sub>1.5</sub>-TS versus temperatures.

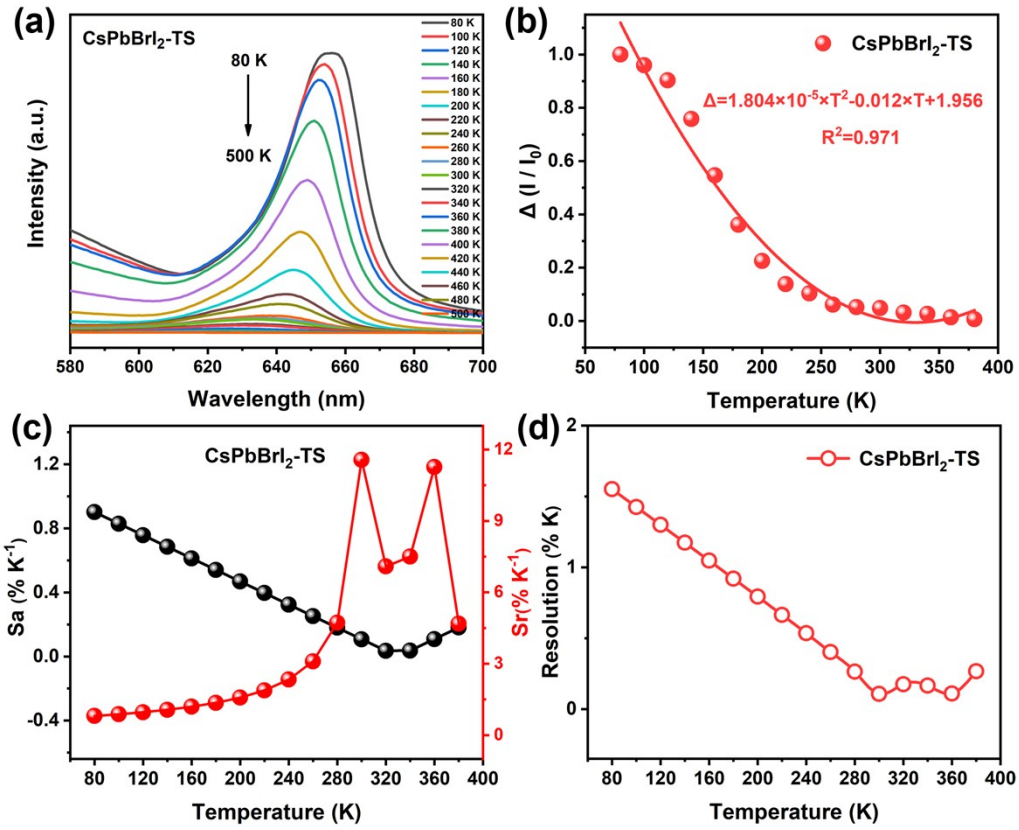

**Fig. S4** PL emission spectra of (a) CsPbBr<sub>2</sub>-TS at different temperatures range from 80 to 500 K; (b) PL intensity ratio of  $I/I_0$  as a function of temperature; (c) Absolute sensitivity ( $S_a$ ) and relative sensitivities ( $S_r$ ) at different temperatures; (d) Corresponding temperature resolution of CsPbBr<sub>2</sub>-TS versus temperatures.

**Table S1** Comparison of the absolute sensitivity ( $S_a$ ), relative sensitivity ( $S_r$ ), and temperature resolution ( $\delta T$ ) of the CsPbX<sub>3</sub>-TS (X = Cl, Br, I) nanocomposites in optical temperature sensing.

| Materials                                   | Temperature range (K) | $S_a$ (maximum) (K <sup>-1</sup> ) | $S_r$ (maximum) (K <sup>-1</sup> ) | $\delta T$ (K) |
|---------------------------------------------|-----------------------|------------------------------------|------------------------------------|----------------|
| CsPbCl <sub>3</sub> -TS                     | 80-380                | 0.35% (at 80 K)                    | 6.61% (at 380 K)                   | 0.039          |
| CsPbCl <sub>1.5</sub> Br <sub>1.5</sub> -TS | 80-380                | 0.34% (at 80 K)                    | 7.32% (at 380 K)                   | 0.039          |
| CsPbBr <sub>3</sub> -TS                     | 80-380                | 1.73% (at 80 K)                    | 7.14% (at 380 K)                   | 0.012          |
| CsPbBr <sub>1.5</sub> I <sub>1.5</sub> -TS  | 80-380                | 0.70% (at 80 K)                    | 16.46% (at 380 K)                  | 0.020          |
| CsPbBr <sub>2</sub> -TS                     | 80-380                | 0.90% (at 80 K)                    | 11.57% (at 300 K)                  | 0.016          |
